# Supplementary material for: Pushing the analytical limits: new insights into complex mixtures using mass spectra segments of constant ultrahigh resolving power
Source: Royal Society of Chemistry journal article supplement (doi:10.1039/c9sc02903f), 2019-01-01
Supplement: c9sc02903f1.pdf [file c9sc02903f1.pdf]

## Supplementary Information

### Pushing the Analytical Limits: New Insights into Complex Mixtures using Mass Spectra Segments of Constant Ultrahigh Resolving Power

Diana Catalina Palacio Lozano,<sup>a,b</sup> Remy Gavard,<sup>c</sup> Juan P. Arenas-Diaz,<sup>b</sup> Mary J. Thomas,<sup>a,c</sup>  
David Stranz,<sup>d</sup> Enrique Mejía-Ospino,<sup>b</sup> Alexander Guzman,<sup>e</sup> Simon E. F. Spencer,<sup>f</sup> David  
Rossell,<sup>g</sup> Mark P. Barrow<sup>a\*</sup>

a. Department of Chemistry, University of Warwick, Coventry, CV4 7AL, United Kingdom

b. Department of Chemistry, Universidad Industrial de Santander, Bucaramanga, Colombia

c. Molecular Analytical Science Centre of Doctoral Training, University of Warwick,  
Coventry, CV4 7AL, United Kingdom

d. Sierra Analytics Inc., Modesto, California, USA

e. Instituto Colombiano del Petróleo, Piedecuesta, Ecopetrol, Colombia

f. Department of Statistics, University of Warwick, Coventry, CV4 7AL, United Kingdom

g. Department of Economics & Business, Universitat Pompeu Fabra, Barcelona 08005, Spain

## Table of Contents

|                                                                  |           |
|------------------------------------------------------------------|-----------|
| <b>1. Sample details .....</b>                                   | <b>2</b>  |
| <b>2. OCULAR method .....</b>                                    | <b>4</b>  |
| <b>3. Distillable sample: D-F .....</b>                          | <b>12</b> |
| <b>4. Space-charge effects in extremely complex samples.....</b> | <b>20</b> |
| <b>5. Truly non-distillable sample (ND-F) .....</b>              | <b>21</b> |
| <b>References.....</b>                                           | <b>28</b> |

### **1. Sample details**

Elemental analysis of the distillable fraction, non-distillable fraction, and the vacuum residue (D-F, ND-F, and VR, respectively) can be found in Table S1. According to the API gravity (American Petroleum Institute), the fractions D-F and ND-F can be classified as heavy and extra-heavy, respectively.

**Distillable fraction.** A sub-fraction of a South American vacuum residue was obtained by supercritical fluid extraction (SFEF). The supercritical solvent was n-hexane and the conditions were a temperature of 265 °C and pressure of 4.5 MPa. The SFEF process has been described elsewhere.<sup>1</sup> As seen in Fig. S1, 90% of the constituents of these fractions have boiling points lower than 720 °C atmospheric equivalent temperature (AET).

**Truly non-distillable fraction.** A short path distillation unit operating at 687 °C AET was used to obtain a truly non-distillable fraction. According to the true boiling point curve (Fig. S1), only 18% of its constituents evaporated below 720 °C AET. Thus, 82% of the constituents

had boiling points with an unknown final boiling point; the heaviest components may not be vaporizable.<sup>2</sup> Considering the extraordinarily high complexity of this sample, the sample was fractionated by solubility in n-heptane (maltenes), which corresponded to 89% of the sample (51% resins, 33% aromatics, and 1% saturates). The maltene fraction was removed from the non-distillable sample by Soxhlet extraction using n-heptane for a period of 12 h.

*Table S1*

Elemental analysis of the South American vacuum residue, distillable fraction, and non-distillable fraction. Density was measured by means of a digital density meter (ASTM D4052),<sup>3</sup> SARA composition analysis by ASTM D2007,<sup>4</sup> and sulfur percentage by ASTM D1552.<sup>5</sup>

|             | VR     | DF     | ND-F   |
|-------------|--------|--------|--------|
| S (Wt. %)   | 1.8    | 1.45   | 1.89   |
| Density     | 1.0251 | 0.9766 | 1.0404 |
| API°        | 6.5    | 12.9   | 4.5    |
| Saturates   | 12     | 35.4   | 1      |
| Aromatics   | 46     | 50.7   | 33     |
| Resins      | 37     | 13.1   | 51     |
| Asphaltenes | 4.9    | 0.7    | 14.6   |

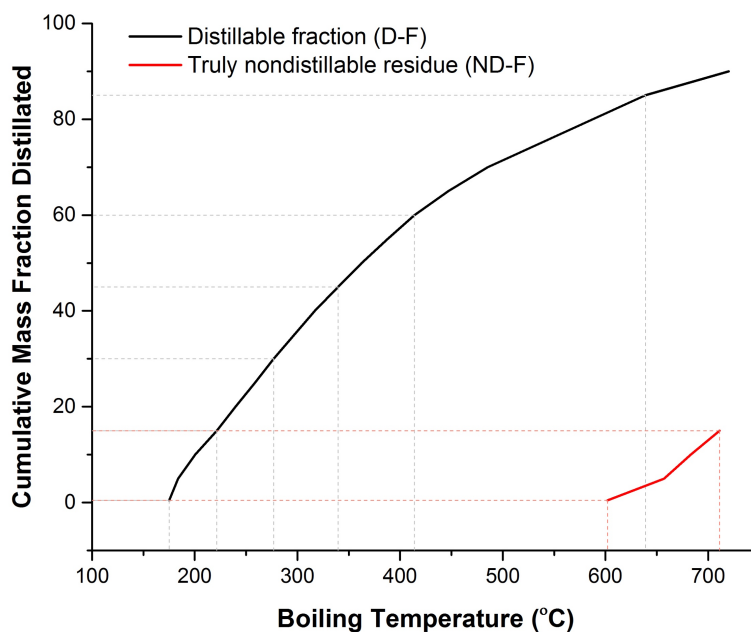

Fig. S1 True boiling point curves of the analysed samples. The boiling temperatures were obtained by high temperature simulate distillation ASTM 7169 that can characterise the oil distillation temperature up to 740 °C AET.<sup>6</sup>

## 2. OCULAR method

The mass resolving power in FT-ICR MS can be estimated by Equation 1

$$R \propto \frac{qBT_{acq}}{mk} \quad (1)$$

where  $R$  is the resolving power,  $q$ ,  $B$ ,  $m$ ,  $k$  and  $T_{acq}$  are the charge of the ion, strength of magnetic field, mass of the ion, peak width constant, and length of the time domain data (acquisition time), respectively.<sup>7</sup> Therefore, the resolution can be improved by recording the time domain signal for a longer durations (larger  $T_{acq}$ ). The length of the time domain signal,  $T_{acq}$ , is also influenced by physical factors such as background gas pressure, inharmonicity of electrostatic field in the cell, space-charge effects, and magnetic field inhomogeneity, among others.<sup>8</sup> Thus, for optimum resolution, the acquisition time should be as long as possible and



the time domain signal should last the full duration. The acquisition time can be calculated using the Equation 2

$$T_{acq} = \frac{N}{f_s} \quad (2)$$

where  $N$  and  $f_s$  are experimental parameters: the data set size and the sampling frequency, respectively. In accordance with the Nyquist theory, the sampling frequency must be twice the frequency of the lowest  $m/z$  being detected; hence, it determined by the low  $m/z$  cut-off values of the mass spectra.<sup>9</sup>

Under ideal experimental conditions (e.g. no collisions with residual gas, ideal electric and magnetic fields, and no space-charge effects), FT-ICR mass spectrometers of lower magnetic field can reach the same resolving power as higher field instrumentation if the duration of the time domain signal is sufficiently high to compensate for the lower magnetic field (see Equation (1) and Table S2). For instance, a resolution of approximately one million (FWHM) can be obtained at  $m/z$  850 using a 7 T FT-ICR with an acquisition time of 10.388 s at 4M, while the same resolving power could be obtained using a 12 T instrument if the transient lasts 6.060 s. It can be challenging, however, to produce longer transients, particularly due to space-charge effects, and so higher field instrumentation offers an advantage.

Table S2

Examples of the acquisition times required for a target, constant resolving power; three selected segments with different low  $m/z$  cut-offs, two magnetic fields, and two data set sizes are shown. The resolving powers afforded using the traditional broadband method are provided for comparison.

|           | Magnetic field strength (T) | Low $m/z$ cut-off* | $m/z$ for measured resolving power | Resolving power ( $\times 10^6$ ) |       | Acquisition time (s) |        |
|-----------|-----------------------------|--------------------|------------------------------------|-----------------------------------|-------|----------------------|--------|
|           |                             |                    |                                    | 4 M                               | 8 M   | 4 M                  | 8 M    |
| OCULAR    | 12                          | 120                | 200                                | 1.070                             | 2.138 | 1.398                | 2.797  |
|           | 7                           | 120                | 200                                | 1.070                             | 2.138 | 2.397                | 4.794  |
|           | 12                          | 520                | 850                                | 1.090                             | 2.180 | 6.060                | 12.119 |
|           | 7                           | 520                | 850                                | 1.090                             | 2.180 | 10.388               | 20.775 |
|           | 12                          | 857                | 1400                               | 1.090                             | 2.181 | 9.987                | 19.973 |
|           | 7                           | 857                | 1400                               | 1.090                             | 2.181 | 17.120               | 34.240 |
| Broadband | 12                          | 120                | 850                                | 0.515                             | 0.503 | 1.398                | 2.797  |
|           | 7                           | 120                | 850                                | 0.515                             | 0.503 | 2.397                | 4.794  |

\* The required low  $m/z$  cut-off can be calculated, such as by using available web resources (e.g. [warwick.ac.uk/barrowgroup/calculators/fticr\\_tools/](http://warwick.ac.uk/barrowgroup/calculators/fticr_tools/))

According to Equations (1) and (2), the resolving power can be increased by increasing the low  $m/z$  cut-off for detection. For instance, as can be seen in Fig. S2, the resolving power at 600 Da for a mass spectrum increases 2x and 3x when the low  $m/z$  cut-off is increased from  $m/z$  200 to  $m/z$  400 and  $m/z$  600 Da, respectively. Thus, an improvement in the resolving power of a broadband mass spectrum can be achieved by segmenting the mass range into narrower windows (see Fig. S2). It is important to notice that the resolving power still decreases with  $m/z$  per segment and thus use of narrower segments offers greater improvement over the traditional broadband experiment. As can be seen in Fig. S2, the acquisition time of the consecutive windows must be increased to maintain the same resolving power as observed for the lowest  $m/z$  detected; in this way, near constant resolving power can be achieved by use of narrow  $m/z$  windows.

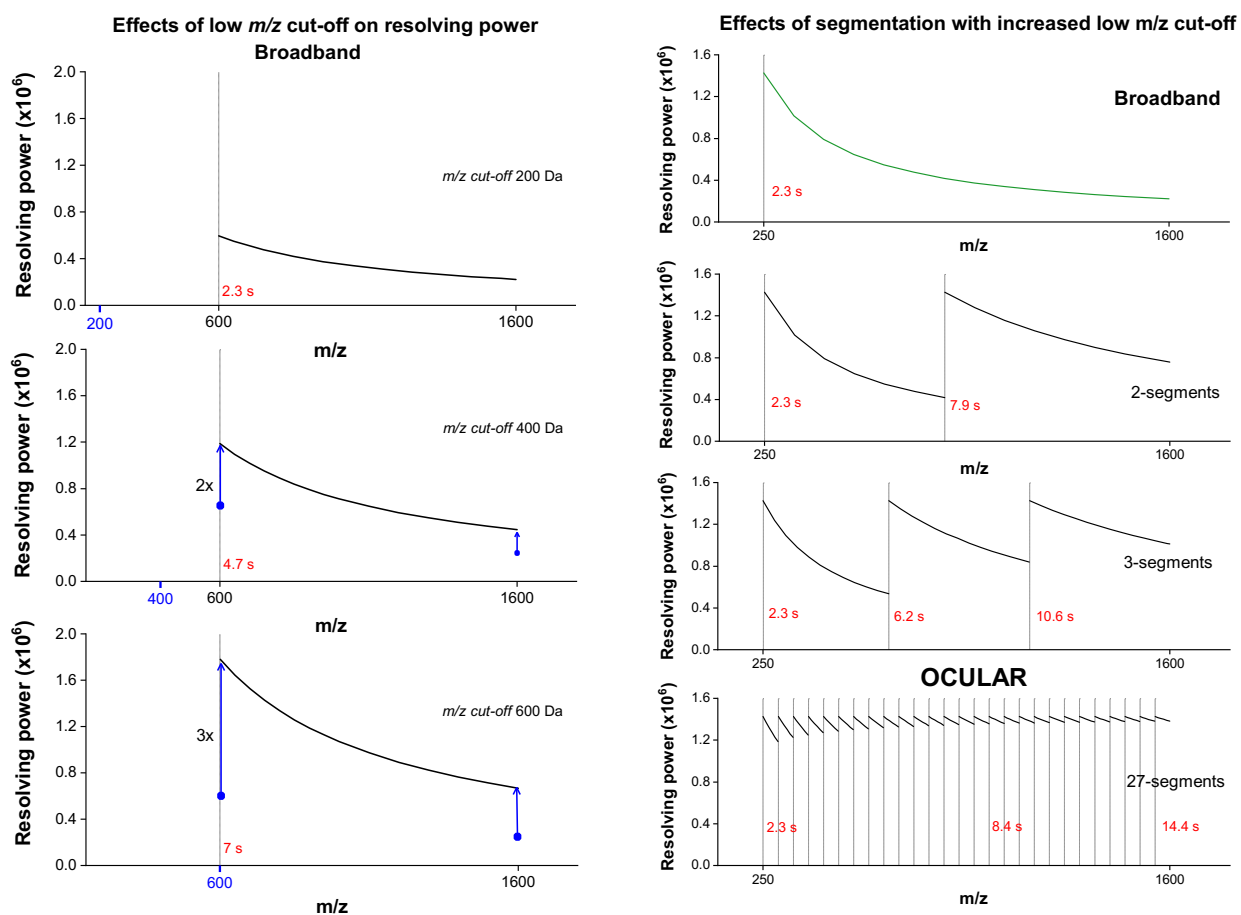

Fig. S2 Left: Resolving power for broadband mass spectra within a range of  $m/z$  600-1600, using low  $m/z$  cut-off at  $m/z$  200,  $m/z$  400,  $m/z$  600. Raising the low  $m/z$  cut-off (values shown in blue) increases the acquisition time and therefore the overall resolving power. Right: Comparison of the resolving power of a broadband spectrum acquired between  $m/z$  250-1600 with segmented mass spectra with sequentially increased acquisition time. Near constant resolution can be achieved through use of smaller data segments. The numbers shown in red correspond to the acquisition times. To simplify the OCULAR figure, the acquisition times are only shown for the first, middle, and last segments.

The OCULAR method includes the use of a quadrupole to isolate  $m/z$  ranges of interest, For sequential  $m/z$  segments, the acquisition times are increased to result in near constant resolving power across the entire  $m/z$  range (multiple segments). Fig. S3 shows the acquisition times ( $T_{acq}$ ) for each segment for the D-F and ND-F samples. For the D-F sample, 4 M data set sizes were used and 41 segments were acquired; for the ND-F sample, 8 M data set sizes were used and 65 segments were acquired.

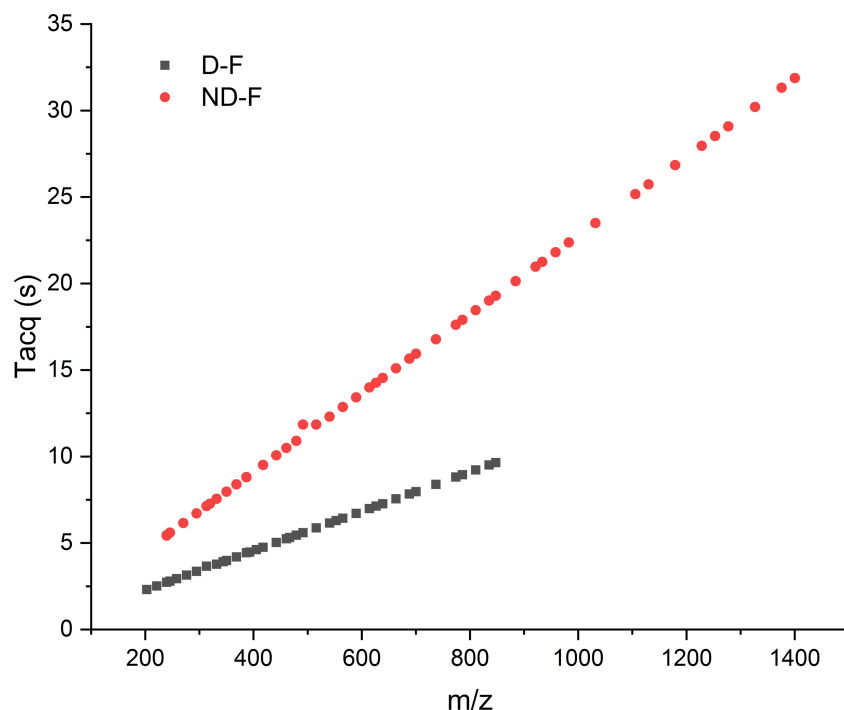

Fig. S3 Acquisition time per segment for the OCULAR experiment, applied to a distillable fraction (D-F) and a truly non-distillable fraction (ND-F) of a petroleum sample.

The low  $m/z$  cut-off and sampling frequency per segment of the stitched spectra are reported in Table S3 for both the D-F and ND-F samples.

Table S3

Low  $m/z$  cut-off, frequency, and acquisition time ( $T_{acq}$ ) per window of the data for the ND-F and D-F samples

| Segment center | ND-F (8 M data sets) |                   |           |                         |                              | D-F (4 M data sets) |                   |           |                         |                              |
|----------------|----------------------|-------------------|-----------|-------------------------|------------------------------|---------------------|-------------------|-----------|-------------------------|------------------------------|
|                | #                    | Low $m/z$ cut-off | $T_{acq}$ | Highest frequency (kHz) | Sampling frequency, 2f (kHz) | #                   | Low $m/z$ cut-off | $T_{acq}$ | Highest frequency (kHz) | Sampling frequency, 2f (kHz) |
| 260            |                      |                   |           |                         |                              | 1                   | 202.6912          | 2.3069    | 909.0910                | 1818.1820                    |
| 278            | 1                    | 239.5439          | 5.4260    | 769.2310                | 1538.4620                    | 2                   | 221.1175          | 2.5166    | 833.3330                | 1666.6660                    |
| 295            | 2                    | 239.5439          | 5.4526    | 769.2308                | 1538.4616                    | 3                   | 239.5439          | 2.7263    | 769.2310                | 1538.4620                    |
| 312            | 3                    | 245.6860          | 5.5924    | 750.0001                | 1500.0002                    | 4                   | 245.6860          | 2.7962    | 750.0010                | 1500.0020                    |
| 330            | 4                    | 270.2544          | 6.1516    | 681.8181                | 1363.6362                    | 5                   | 257.9702          | 2.9360    | 714.2800                | 1428.5600                    |
| 348            | 5                    | 294.8228          | 6.7109    | 625.0000                | 1250.0000                    | 6                   | 276.3965          | 3.1457    | 666.6670                | 1333.3340                    |
| 366            | 6                    | 313.2491          | 7.1303    | 588.2352                | 1176.4704                    | 7                   | 294.8228          | 3.3554    | 625.0001                | 1250.0002                    |
| 384            | 7                    | 319.3911          | 7.2701    | 576.9230                | 1153.8460                    | 8                   | 313.2491          | 3.6551    | 588.2300                | 1176.4600                    |

|      |    |           |         |          |           |    |          |        |          |           |
|------|----|-----------|---------|----------|-----------|----|----------|--------|----------|-----------|
| 402  | 8  | 331.6753  | 7.5498  | 555.5553 | 1111.1106 | 9  | 331.6753 | 3.7750 | 555.5550 | 1111.1100 |
| 420  | 9  | 350.1015  | 7.9692  | 526.3157 | 1052.6314 | 10 | 343.9595 | 3.9147 | 535.7150 | 1071.4300 |
| 438  | 10 | 368.5277  | 8.3886  | 500.0010 | 1000.0020 | 11 | 350.1015 | 3.9846 | 526.3160 | 1052.6320 |
| 456  | 11 | 386.9539  | 8.8037  | 476.1902 | 952.3804  | 12 | 368.5277 | 4.1943 | 500.0010 | 1000.0020 |
| 475  | 12 | 386.9539  | 8.8084  | 476.1905 | 952.3810  | 13 | 386.9539 | 4.4404 | 476.1903 | 952.3806  |
| 494  | 13 | 417.6642  | 9.5071  | 441.1765 | 882.3529  | 14 | 393.0960 | 4.4740 | 468.7501 | 937.5002  |
| 513  | 14 | 442.2324  | 10.0663 | 416.6666 | 833.3332  | 15 | 405.3801 | 4.6137 | 454.5460 | 909.0920  |
| 531  | 15 | 442.2324  | 10.0663 | 416.6666 | 833.3332  | 16 | 417.6642 | 4.7535 | 441.1765 | 882.3530  |
| 550  | 16 | 460.6585  | 10.4858 | 400.0001 | 800.0002  | 17 | 442.2324 | 5.0332 | 416.6670 | 833.3340  |
| 568  | 17 | 479.0846  | 10.9052 | 384.6153 | 769.2306  | 18 | 460.6585 | 5.2488 | 400.0010 | 800.0020  |
| 587  | 18 | 491.3687  | 11.8491 | 375.0001 | 750.0002  | 19 | 466.8005 | 5.3128 | 394.7370 | 789.4740  |
| 605  | 19 | 515.9367  | 11.8491 | 357.1429 | 714.2858  | 20 | 479.0846 | 5.4526 | 384.6152 | 769.2304  |
| 624  | 20 | 540.5048  | 12.3033 | 340.9091 | 681.8182  | 21 | 491.3687 | 5.5924 | 375.0010 | 750.0020  |
| 643  | 21 | 540.5048  | 12.3033 | 340.9091 | 681.8182  | 22 | 515.9367 | 5.8702 | 357.1429 | 714.2858  |
| 662  | 22 | 565.0728  | 12.8625 | 326.0869 | 652.1738  | 23 | 540.5048 | 6.1565 | 340.9090 | 681.8180  |
| 681  | 23 | 589.6408  | 13.4218 | 313.0001 | 626.0002  | 24 | 552.7888 | 6.2915 | 333.3330 | 666.6660  |
| 700  | 24 | 614.2088  | 13.9902 | 300.0010 | 600.0020  | 25 | 565.0728 | 6.4313 | 326.0869 | 652.1738  |
| 718  | 25 | 626.4927  | 14.2606 | 294.1175 | 588.2350  | 26 | 589.6408 | 6.7109 | 312.5001 | 625.0002  |
| 737  | 26 | 638.7767  | 14.5406 | 286.4615 | 572.9230  | 27 | 589.6408 | 6.7109 | 312.5001 | 625.0002  |
| 756  | 27 | 638.7767  | 14.5405 | 286.4615 | 572.9230  | 28 | 614.2088 | 6.9905 | 300.0010 | 600.0020  |
| 775  | 28 | 663.3446  | 15.0995 | 277.7778 | 555.5556  | 29 | 626.4927 | 7.1302 | 294.1177 | 588.2353  |
| 794  | 29 | 663.3446  | 15.0995 | 277.7778 | 555.5556  | 30 | 638.7767 | 7.2701 | 289.4615 | 578.9230  |
| 813  | 30 | 687.9124  | 15.6587 | 267.8572 | 535.7144  | 31 | 663.3446 | 7.5498 | 277.7770 | 555.5540  |
| 832  | 31 | 700.1963  | 15.9384 | 263.1579 | 526.3158  | 32 | 663.3446 | 7.5498 | 277.7770 | 555.5540  |
| 851  | 32 | 737.0480  | 16.7771 | 250.0001 | 500.0002  | 33 | 687.9124 | 7.8294 | 267.8571 | 535.7142  |
| 870  | 33 | 773.8996  | 17.6161 | 238.0952 | 476.1905  | 34 | 700.1963 | 7.9692 | 263.1590 | 526.3180  |
| 889  | 34 | 786.1835  | 17.8957 | 234.3750 | 468.7500  | 35 | 737.0480 | 8.3886 | 250.0010 | 500.0020  |
| 908  | 35 | 810.7512  | 18.4549 | 227.2727 | 454.5454  | 36 | 737.0480 | 8.3886 | 250.0010 | 500.0020  |
| 927  | 36 | 835.3188  | 19.0142 | 220.5883 | 441.1765  | 37 | 773.8996 | 8.8080 | 238.0952 | 476.1904  |
| 946  | 37 | 835.3188  | 19.0142 | 220.5883 | 441.1765  | 38 | 786.1835 | 8.9478 | 234.3750 | 468.7500  |
| 965  | 38 | 847.6026  | 19.2937 | 217.3913 | 434.7826  | 39 | 810.7512 | 9.2276 | 227.2729 | 454.5458  |
| 984  | 39 | 847.6026  | 19.2937 | 217.3913 | 434.7826  | 40 | 835.3188 | 9.5071 | 220.5882 | 441.1765  |
| 1002 | 40 | 847.6026  | 19.2937 | 217.3913 | 434.7826  | 41 | 847.6026 | 9.6469 | 217.3913 | 434.7826  |
| 1020 | 41 | 884.4540  | 20.1327 | 209.3333 | 418.6667  |    |          |        |          |           |
| 1038 | 42 | 884.4540  | 20.1327 | 209.3333 | 418.6667  |    |          |        |          |           |
| 1056 | 43 | 921.3053  | 20.9715 | 200.0001 | 400.0002  |    |          |        |          |           |
| 1074 | 44 | 921.3053  | 20.9715 | 200.0001 | 400.0002  |    |          |        |          |           |
| 1093 | 45 | 933.5891  | 21.2512 | 197.3684 | 394.7368  |    |          |        |          |           |
| 1113 | 46 | 933.5891  | 21.2512 | 197.3684 | 394.7368  |    |          |        |          |           |
| 1133 | 47 | 958.1566  | 21.8104 | 192.3077 | 384.6154  |    |          |        |          |           |
| 1153 | 48 | 982.7240  | 22.3696 | 187.5001 | 375.0002  |    |          |        |          |           |
| 1173 | 49 | 982.7240  | 22.3696 | 187.5001 | 375.0002  |    |          |        |          |           |
| 1193 | 50 | 1031.8588 | 23.4981 | 178.5760 | 357.1520  |    |          |        |          |           |
| 1213 | 51 | 1105.5608 | 25.1658 | 166.6666 | 333.3332  |    |          |        |          |           |
| 1233 | 52 | 1105.5608 | 25.1658 | 166.6666 | 333.3332  |    |          |        |          |           |
| 1253 | 53 | 1130.1280 | 25.7281 | 163.0400 | 326.0800  |    |          |        |          |           |
| 1273 | 54 | 1179.2624 | 26.8436 | 156.2501 | 312.5002  |    |          |        |          |           |
| 1293 | 55 | 1179.2624 | 26.8436 | 156.2501 | 312.5002  |    |          |        |          |           |

|      |    |           |         |          |          |
|------|----|-----------|---------|----------|----------|
| 1313 | 56 | 1179.2624 | 26.8436 | 156.2501 | 312.5002 |
| 1333 | 57 | 1228.3967 | 27.9622 | 150.0001 | 300.0002 |
| 1353 | 58 | 1252.9638 | 28.5213 | 147.0590 | 294.1180 |
| 1373 | 59 | 1277.5308 | 29.0805 | 144.2401 | 288.4802 |
| 1393 | 60 | 1326.6648 | 30.1999 | 138.8880 | 277.7760 |
| 1413 | 61 | 1326.6648 | 30.1999 | 133.9280 | 267.8560 |
| 1433 | 62 | 1326.6648 | 30.1999 | 133.9280 | 267.8560 |
| 1453 | 63 | 1375.7987 | 31.3175 | 133.9280 | 267.8560 |
| 1473 | 64 | 1375.7987 | 31.3175 | 133.9286 | 267.8572 |
| 1493 | 65 | 1400.3656 | 31.8767 | 131.5789 | 263.1579 |

*Table S4*

Acquisition parameters of the spectra in broadband mode and using the OCULAR method

|                                 | <b>Broadband</b> | <b>OCULAR</b>                         | <b>OCULAR</b>                         |
|---------------------------------|------------------|---------------------------------------|---------------------------------------|
|                                 | <b>D-F</b>       | <b>D-F</b>                            | <b>ND-F</b>                           |
| Flow rate                       |                  | 500 $\mu$ L/h                         |                                       |
| Drying gas temperature          |                  | 250 $^{\circ}$ C                      |                                       |
| Vaporizer temperature           |                  | 350 $^{\circ}$ C                      |                                       |
| Capillary voltage               |                  | 1200 V                                |                                       |
| Excitation setting              |                  | 20 %                                  |                                       |
| Trapping: back plate            |                  | 0.4 V                                 |                                       |
| Trapping: front plate           |                  | 0.4 V                                 |                                       |
| Concentration                   | 0.05 mg/mL       | 0.05 mg/mL                            | 0.04 mg/mL                            |
| Data size                       | 4 MW             | 4 MW                                  | 8 MW                                  |
| Range of acquisition time       | 3.2 s            | 2.3-10.7 s                            | 5.4-32 s                              |
| Number of segments acquired     | 1                | 41                                    | 65                                    |
| Accumulated scans               | 100              | 50/segment                            | 100/segment                           |
| Ion accumulation time           | 0.03 s           | 0.6 s                                 | 5.0 s                                 |
| <i>m/z</i> range or width       | 2750             | 24                                    | 24                                    |
| Low mass cut-off for detection  | <i>m/z</i> 200   | Increased<br>in-line with<br>segments | Increased<br>in-line with<br>segments |
| Low mass cut-off for excitation | 250              | 250                                   | 250                                   |
| Spectrum mode                   | Absorption       | Absorption                            | Absorption                            |

## 2.1 Rhapso

A flowchart of the steps required to stitch the data using the in-house software “Rhapso” can be seen in Fig. 1 in the main text. An example of the result of step 1 is illustrated in Fig. S4, with a before and after trimming of the segment between  $m/z$  557-580. After further steps, Fig. S5 shows the intensity correction for the segment  $m/z$  595-616; mass spectra resulting from traditional broadband acquisition, stitching without intensity correction, and the OCULAR method could then be compared.

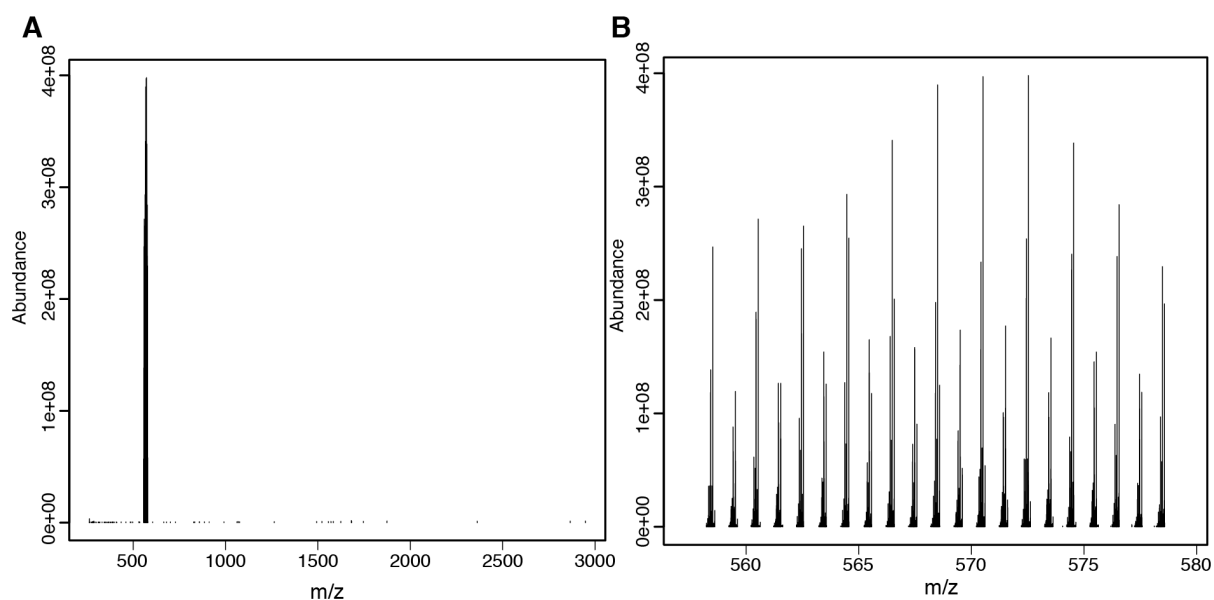

Fig. S4 Plot of the spectrum (A) before trimming for the targeted mass range  $m/z$  558-579 and (B) after automatic noise removal

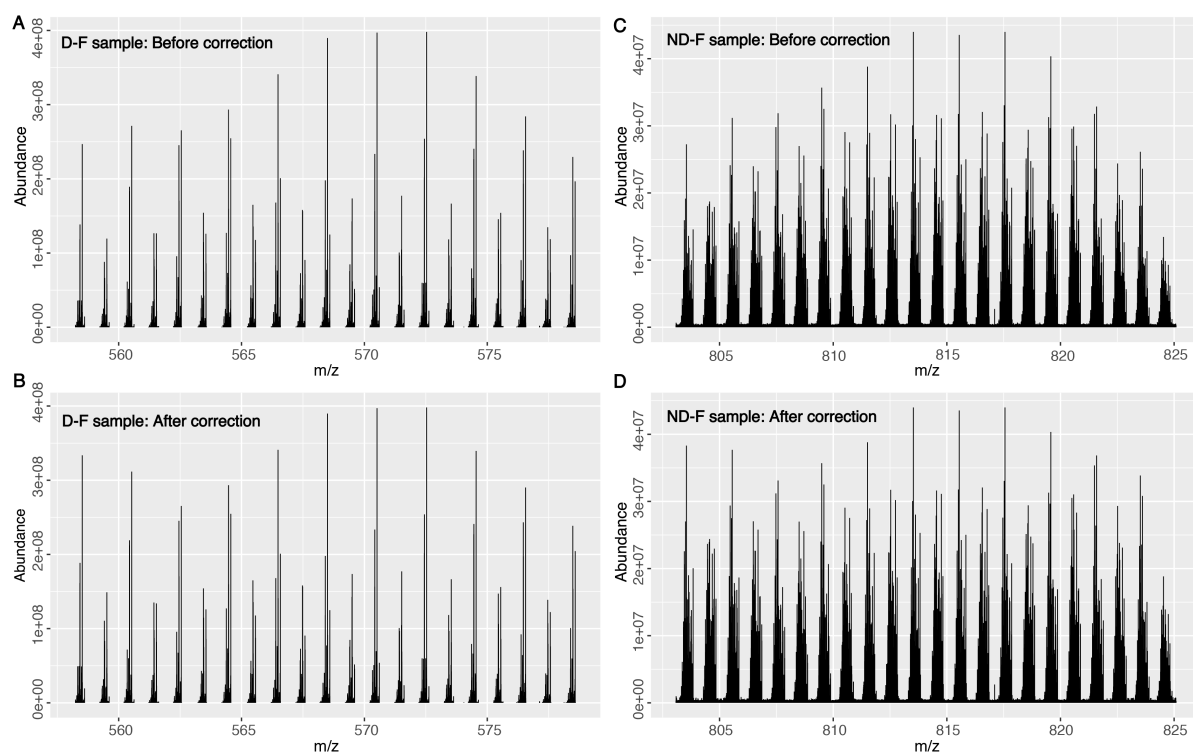

Fig. S5 Segments for the D-F (A and B, left) and ND-F samples (C and D, right), both before (top) and after (bottom) intensity correction. The natural undulations are preserved while correcting the signal attenuation due to the isolation process using the quadrupole.

### 3. Distillable sample: D-F

As a result of the ultrahigh resolution of the stitched spectra and the improved dynamic range, the number of peaks assigned were increased by three-fold compared with the broadband absorption mode mass spectrum (4.6-fold compared with the broadband magnitude mode mass spectrum, see Fig. S6). The assigned peaks were plotted as contributions by heteroatomic class,  $C_cH_hN_nO_oS_s$ , (Fig. S7). Compound classes with the label “[H]” denote protonated species, which those classes without the label were observed as radical ions. According to this Figure, approximately twice as many radical ions were observed in the stitched mass spectrum and approximately twice as many compound classes became accessible e.g.  $OS_2$ ,  $O_3$ ,  $N_2O$ ,  $N_2$ ,  $N_4OV$  (see Fig. S7, among others). It is worth noting that the relative contributions of radical ions versus protonated species are influenced by experimental parameters, such as sample



infusion rate.<sup>10</sup> The total number of peaks assigned were significantly increased for each class, although the relative abundance (in percentage) of the classes remained similar.

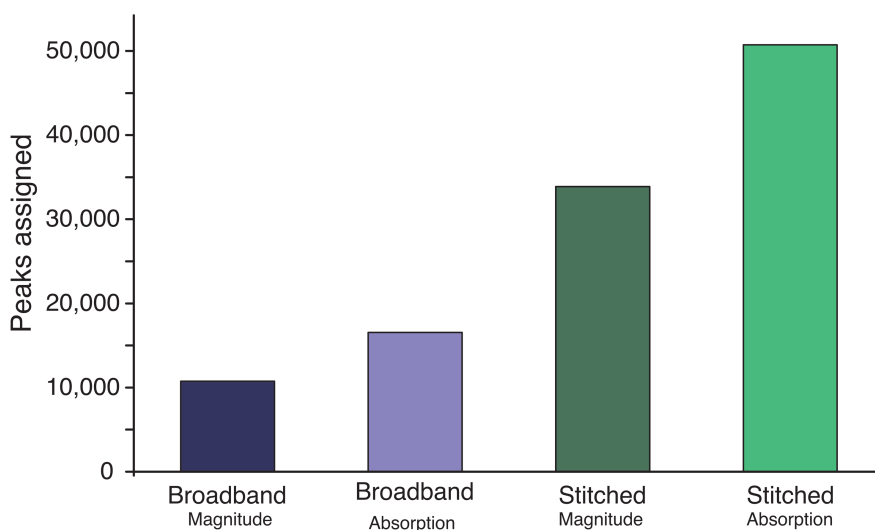

Fig. S6 Number of molecular compositions assigned for the D-F mass spectra obtained using different methods: magnitude mode vs. absorption mode, and broadband vs. stitching.

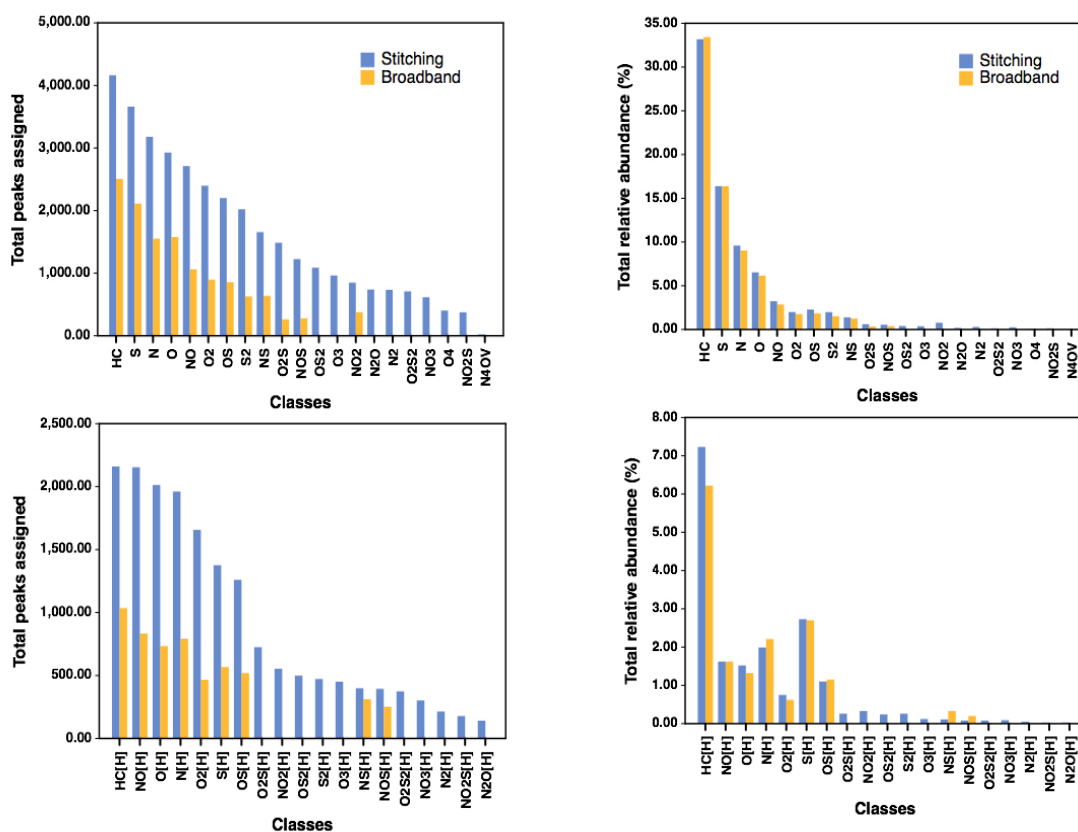

Fig. S7 Class distribution comparing the number of peaks and total relative abundance of the assignments obtained for the broadband and OCULAR data for the D-F sample.

As can be seen in Fig. S8 and Fig. S9, more peaks were assigned at the extremities of the DBE and carbon number ranges for each class in the OCULAR data. Similarly, homologous series of species in low percentage of abundance (e.g. N<sub>2</sub>O at 0.18%) were clearly assigned in the compositional space defined by the DBE and carbon number. Thus, the ultrahigh mass resolution and mass accuracy attained using the OCULAR method affords new abilities to reveal the compositional space of species in lower abundance. In agreement with previous findings,<sup>11,12</sup> the combination of narrow windows increases the number of ions assigned as a result of the enhanced S/N at the low and high mass ends of the mass distribution and the improved dynamic range when more ions can be accumulated for longer periods of time with reduced space-charge effects.

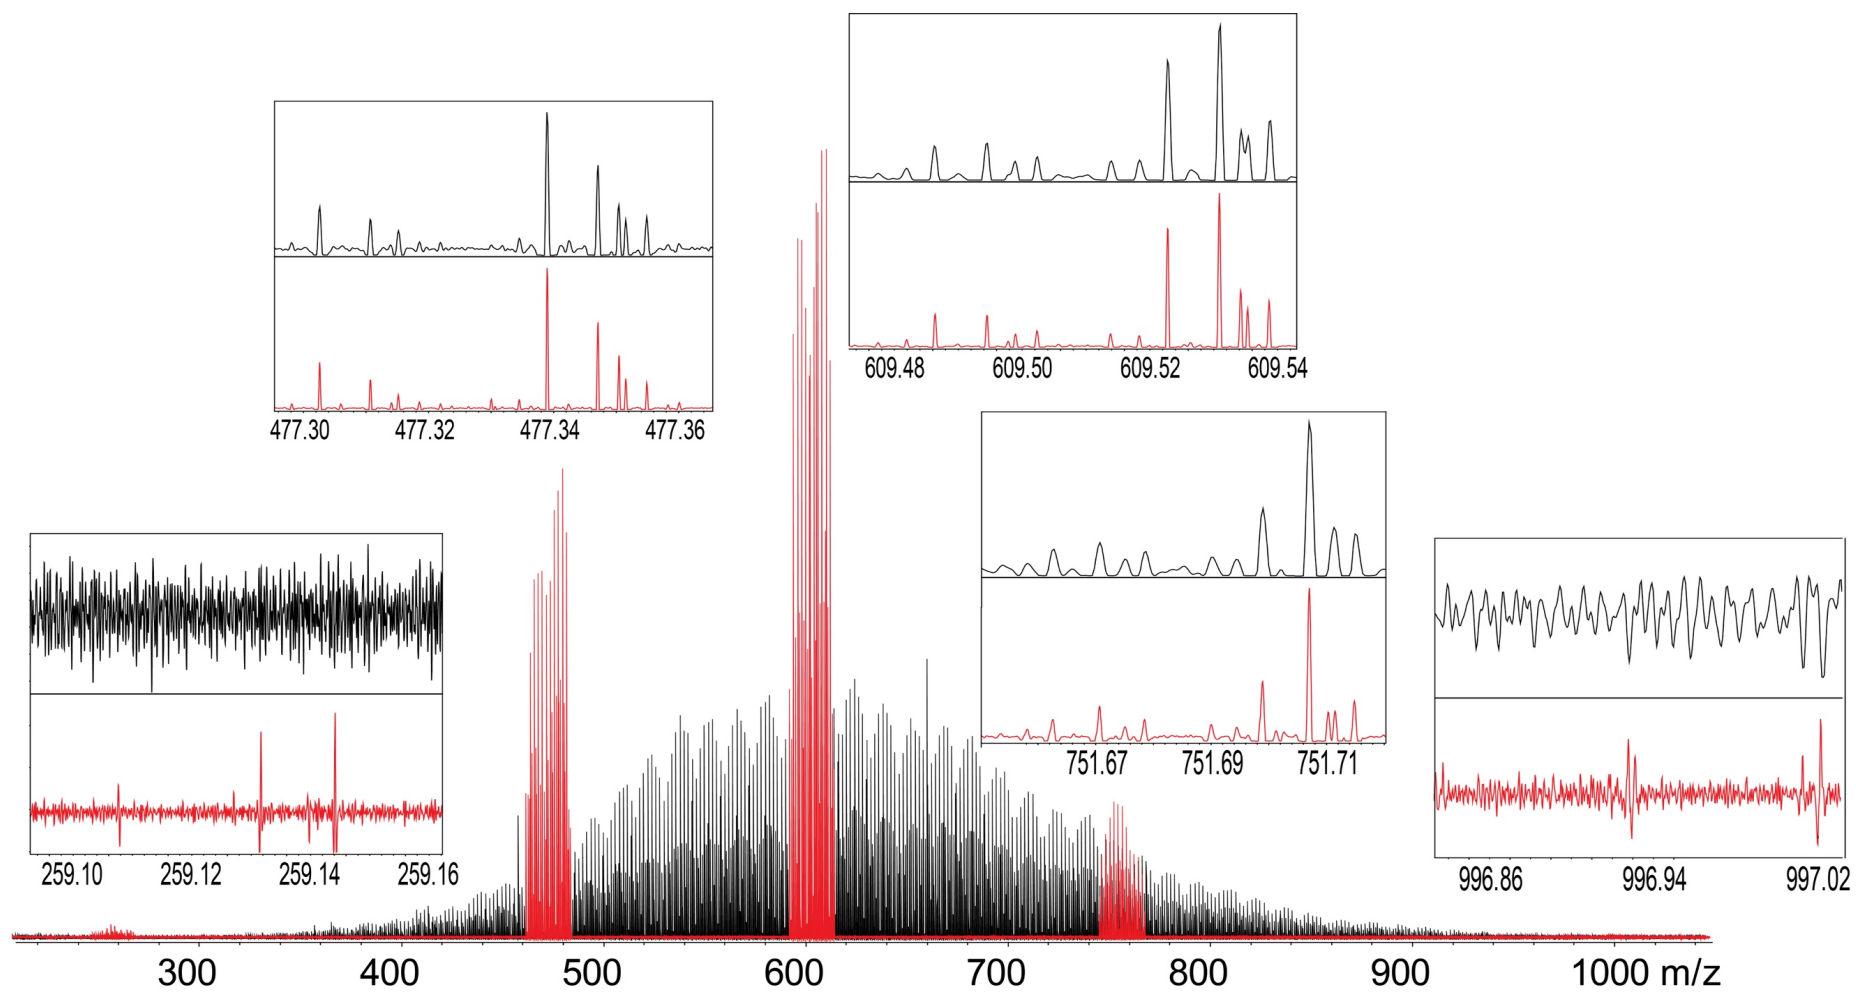

Fig. S8 In black, mass spectrum of the distillate sample in broadband mode. In red, five mass spectra acquired using isolation windows for narrow ranges as examples to demonstrate performance improvements. The inserts show enlarged  $m/z$  ranges of the data acquired using both methods. All data are shown in absorption mode

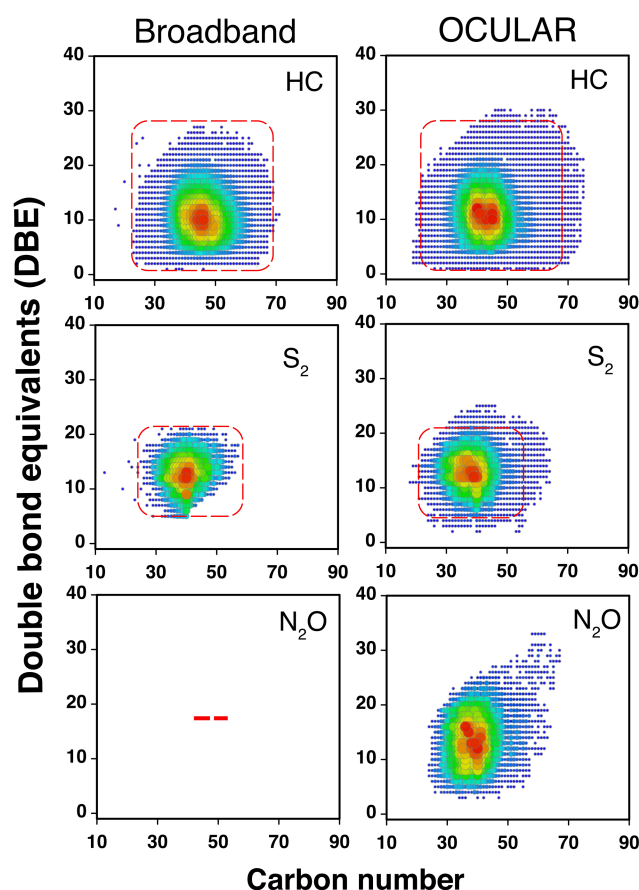

Fig. S9 Plots of DBE versus carbon number of selected classes in broadband mode (left) and using the OCULAR method (right) for the D-F sample. The N<sub>2</sub>O class was not detected at all in the broadband spectrum.

The mean resolving power per narrow window is almost constant (average of 1,792,000 FWHM) over the full mass range (see Fig. S10). As shown in Fig. S11 and Table S5, about the half of the assigned peaks correspond to the isotopologues that were resolved and assigned with low ppm error (<0.5 ppm) in the mass spectrum, even at higher masses (Fig. S12). Thus, the isotopic contributions from <sup>13</sup>C<sub>4</sub>, <sup>34</sup>S<sub>2</sub>, and <sup>13</sup>C<sup>34</sup>S assist in the correct assignment of molecular formulae.

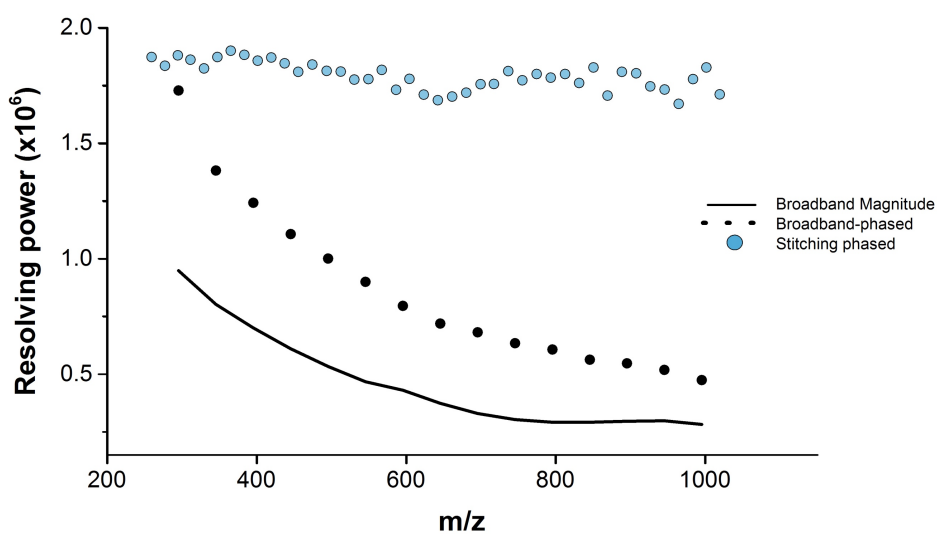

Fig. S10 Comparison of the average resolving power as a function of  $m/z$  for the D-F sample using: a broadband mass spectrum using magnitude mode, a broadband mass spectrum using absorption mode (“phased”), and a corrected stitched data set using absorption mode (the OCULAR method), using the mean resolution of each segment.

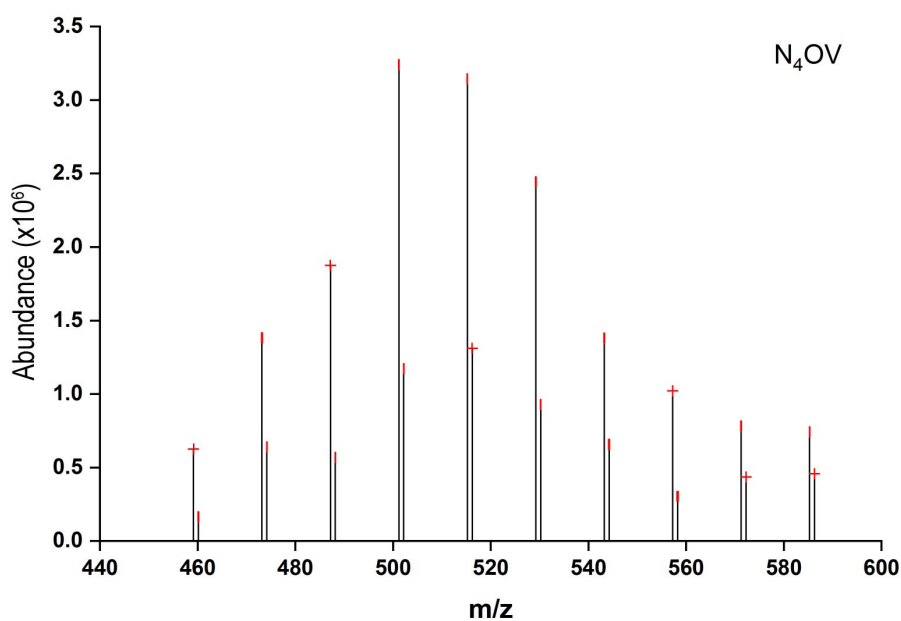

Fig. S11 Mass distribution of a homologous series (17 DBE) for the  $N_4OV$  class found in the OCULAR data for the stitched spectrum of the D-F sample, with a relative abundance of only 0.01% (see Figure S8). The confidence in the assignment is based on the low mass errors (horizontal bars in red) and the isotopic distribution.

Table S5

Isotopic number of peaks detected in broadband and OCULAR method for the D-F sample (not detected denoted by “-”).

| Isotope                          | OCULAR | Broadband |
|----------------------------------|--------|-----------|
| Monoisotopic                     | 24,878 | 10,585    |
| $^{13}\text{C}_1$                | 15,549 | 5,238     |
| $^{13}\text{C}_2$                | 8,572  | 1,824     |
| $^{13}\text{C}_3$                | 1,115  | 219       |
| $^{13}\text{C}_4$                | 64     | -         |
| $^{34}\text{S}_1$                | 591    | 348       |
| $^{13}\text{C}_1^{34}\text{S}_1$ | 420    | 182       |
| $^{13}\text{C}_2^{34}\text{S}_1$ | 52     | 3         |
| $^{18}\text{O}_1$                | 2      | -         |
| $^{15}\text{N}_1$                | 119    | -         |

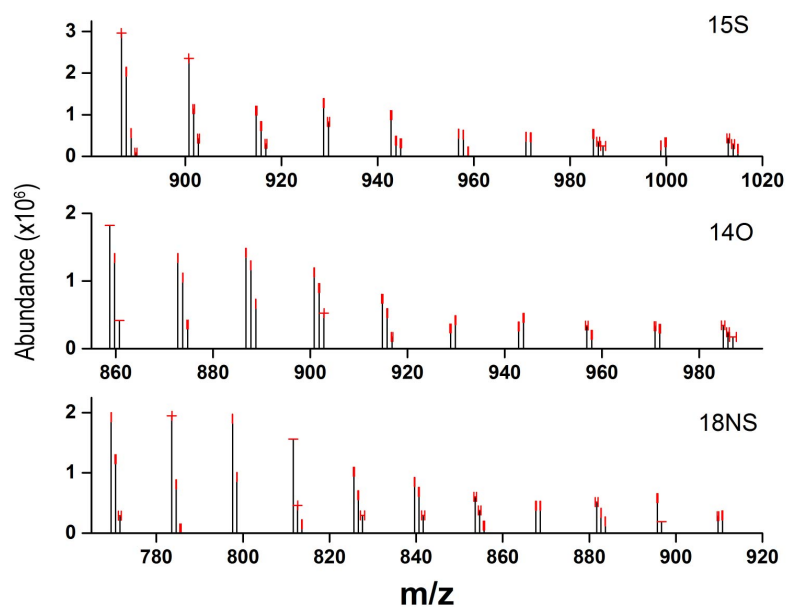

Fig. S12 Isotopic contributions at the tail of selected homologous series, observed at low S/N within the D-F sample data. Bars in red indicate the mass error of the assignment, in ppm. DBE values are indicated by the number preceding the class name (e.g. 18 NS corresponds to a class NS with a DBE of 18)

To illustrate that ultrahigh resolution is also necessary to improve mass accuracy, a comparison of a zoom-in of the mass distribution is shown in Fig. S13. At  $m/z$  637, a resolution of 519,000 FWHM is not enough to baseline resolve and assign molecular compositions to peaks with a mass difference of 1.10 mDa, corresponding to a difference of  $^{12}\text{C}_4$  vs  $^{13}\text{CH}_3\text{S}$ . At higher masses, such as  $m/z$  793, peaks with this same mass difference are no longer resolved and coalescence of the peaks is observed. In this particular case, both assignments are possible within the tolerable mass error. Only after attaining the ultrahigh resolution achieved in the OCULAR data could it be demonstrated that both assignments were valid.

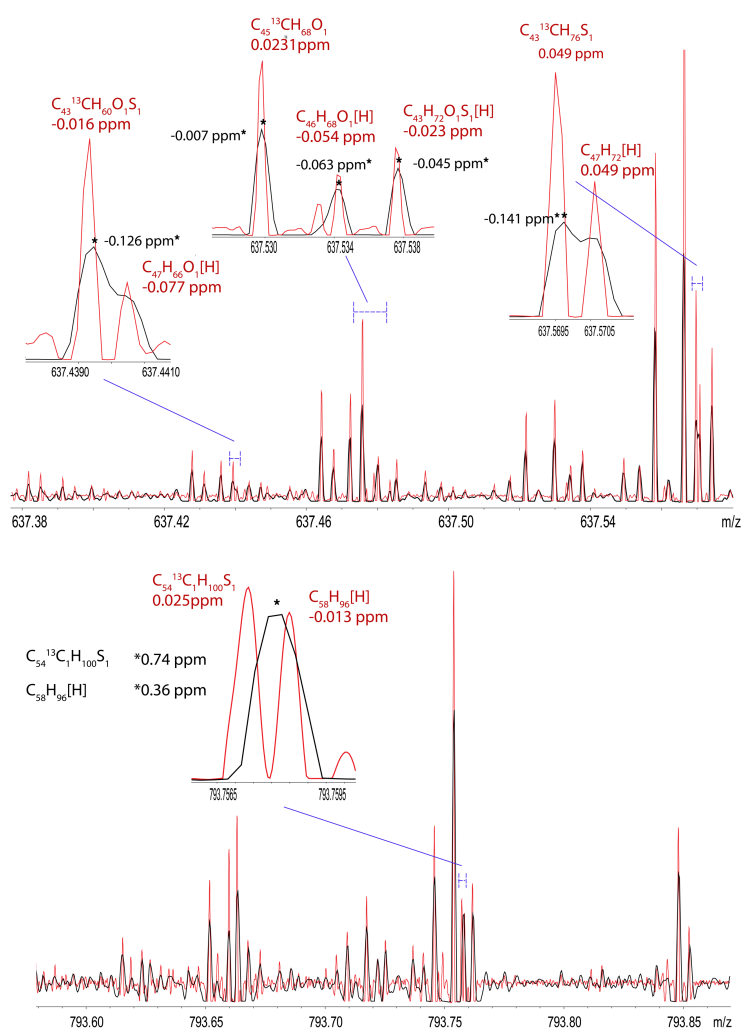

Fig. S13 Comparison of enlarged regions for  $m/z$  637 and  $m/z$  793, with data acquired using broadband mode (dark line) and the OCULAR method (red line) for the D-F sample. The values with an asterisk (\*) are the corresponding ppm error of the peaks in broadband.

#### 4. Space-charge effects in extremely complex samples

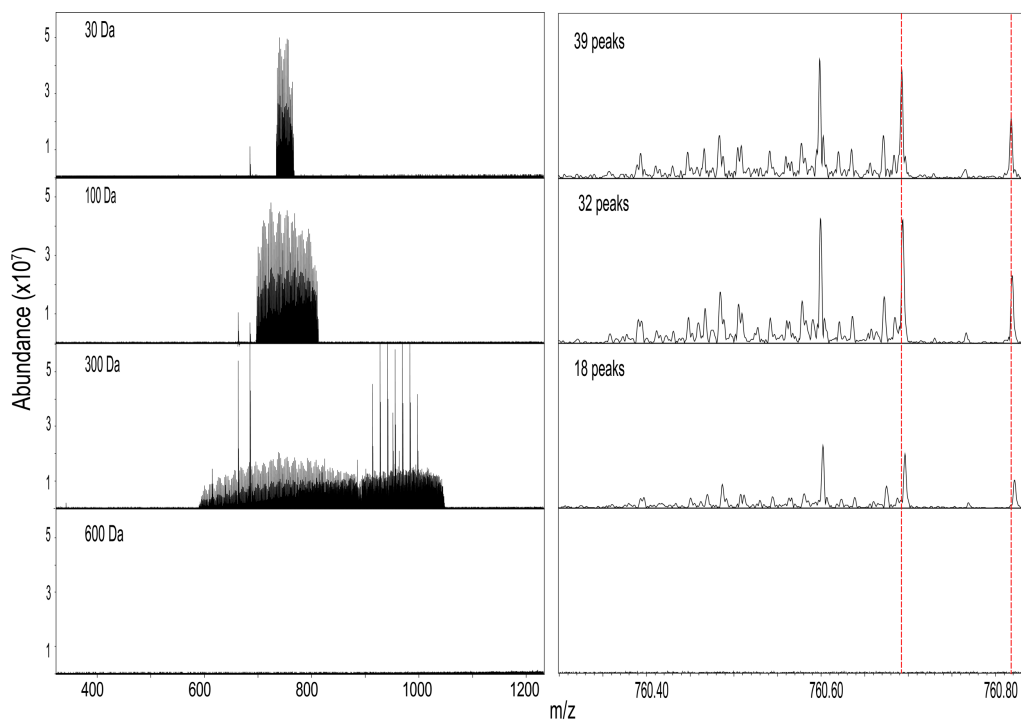

Fig. S14 Mass spectra of the ND-F fraction obtained by positive-ion ESI FT-ICR MS using varying isolation window sizes. The spectra were obtained with a constant low mass cut-off at  $m/z$  200, with an ion accumulation time of 3 seconds. The isolation window center was  $m/z$  750 and only the window width was changed (values listed on left hand side of the data sets). Using a window  $m/z$  width of 600, no signal was observed. The right-hand side shows enlarged  $m/z$  regions, centered at  $m/z$  760. As can be seen, when increasing the window widths, peaks separated by small mass difference tend to coalesce and peaks also shift to higher  $m/z$ , both as a consequence of multiple space-charge effects due to the increasing number of ions.



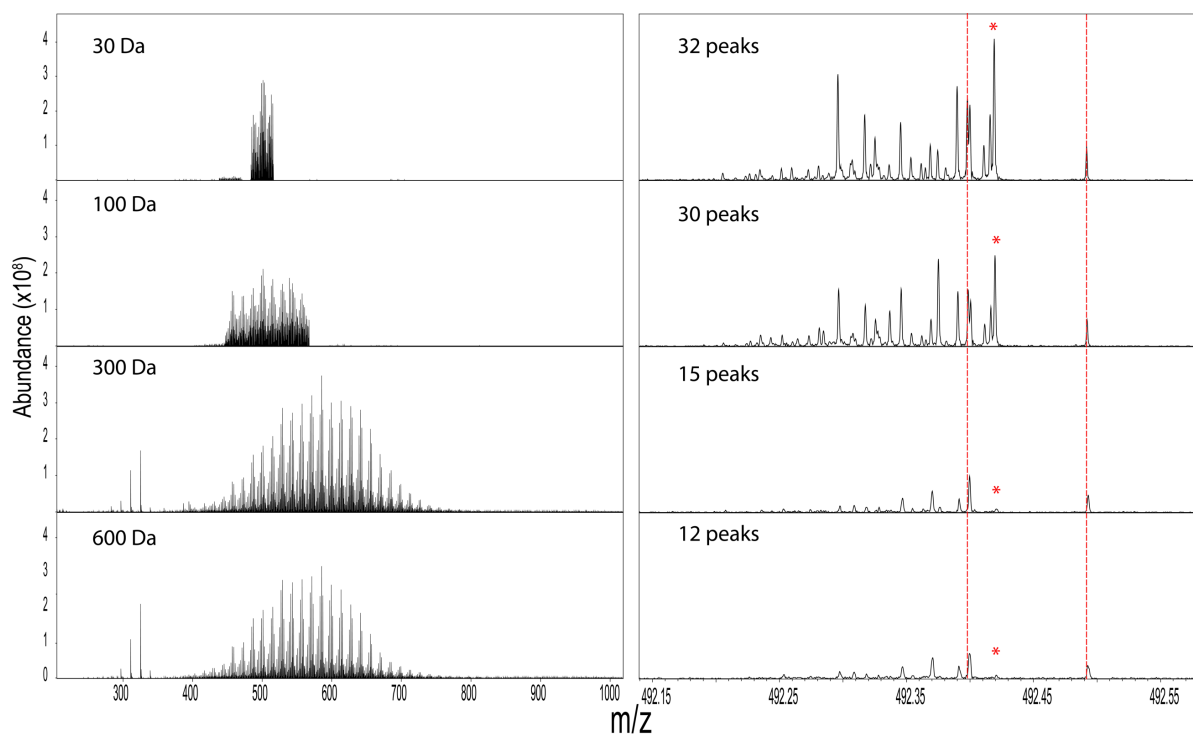

Fig. S15 Mass spectra of the D-F sample obtained by positive-ion ESI FT-ICR MS using varying isolation window sizes. The spectra were obtained with a constant low mass cut-off of  $m/z$  200, with an ion accumulation time of 0.8 seconds. The isolation window center was  $m/z$  500. In contrast to a very complex sample, such as the ND-F fraction, the windows width not significantly affect the signal intensity. Space-charge effects were observed, however, as a consequence of the increased window widths leading to greater on populations within the instrument.

## 5. Truly non-distillable sample (ND-F)

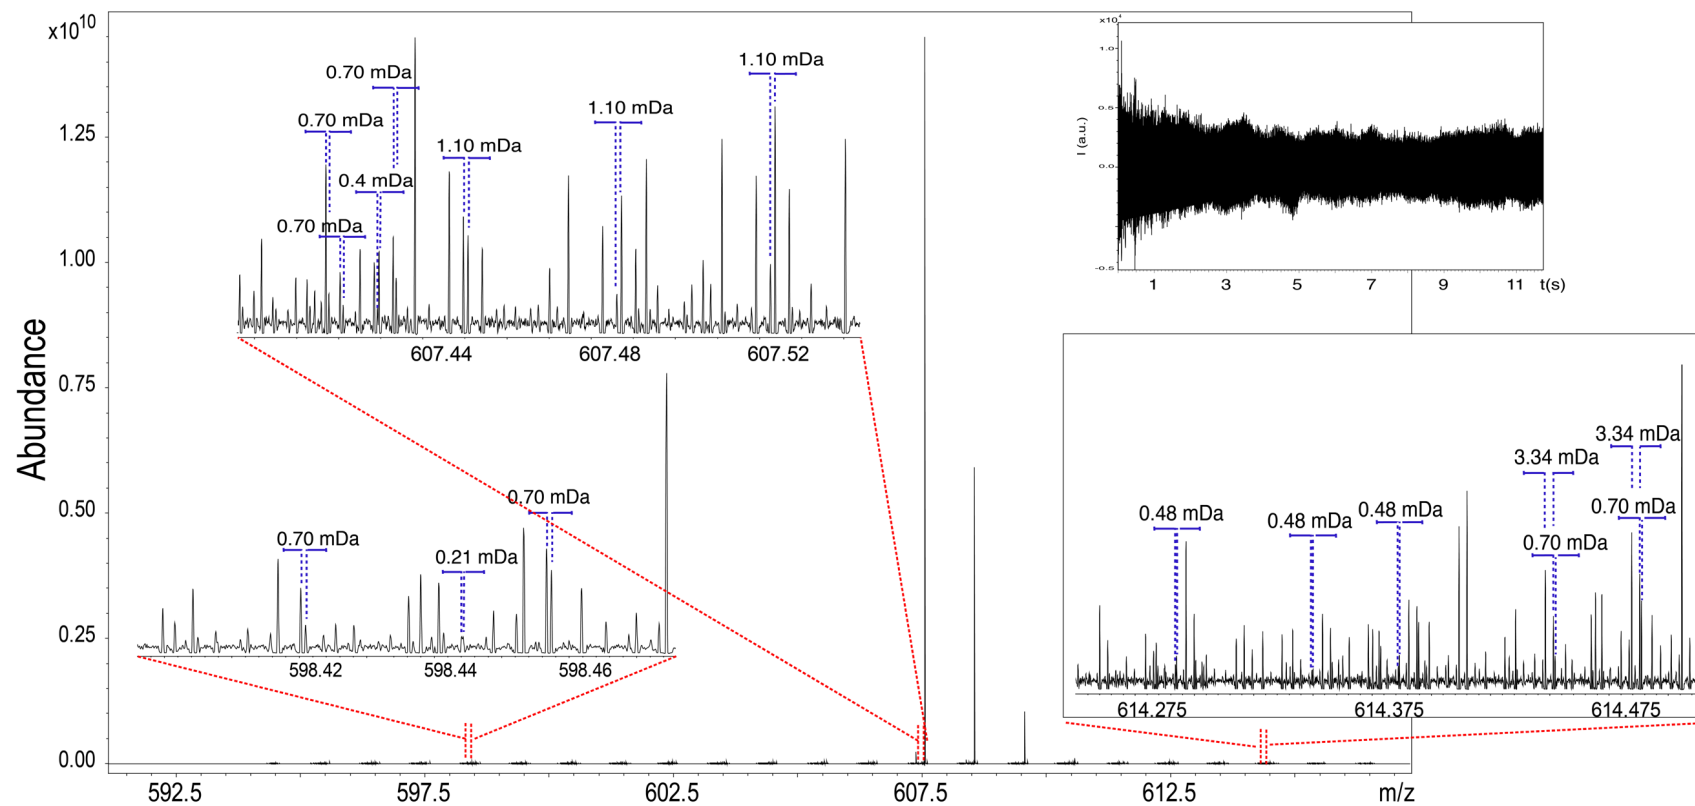

Fig. S16 Mass spectrum acquired using the OCULAR method for the ND-F sample, with a window  $m/z$  width of 24, centered at  $m/z$  605, and with a low mass cut off at  $m/z$  515.9. The transient length of approximately 12 s allows a mean resolving power of 3,130,000 FWHM. The enlarged regions show selected mass differences between assigned peaks.

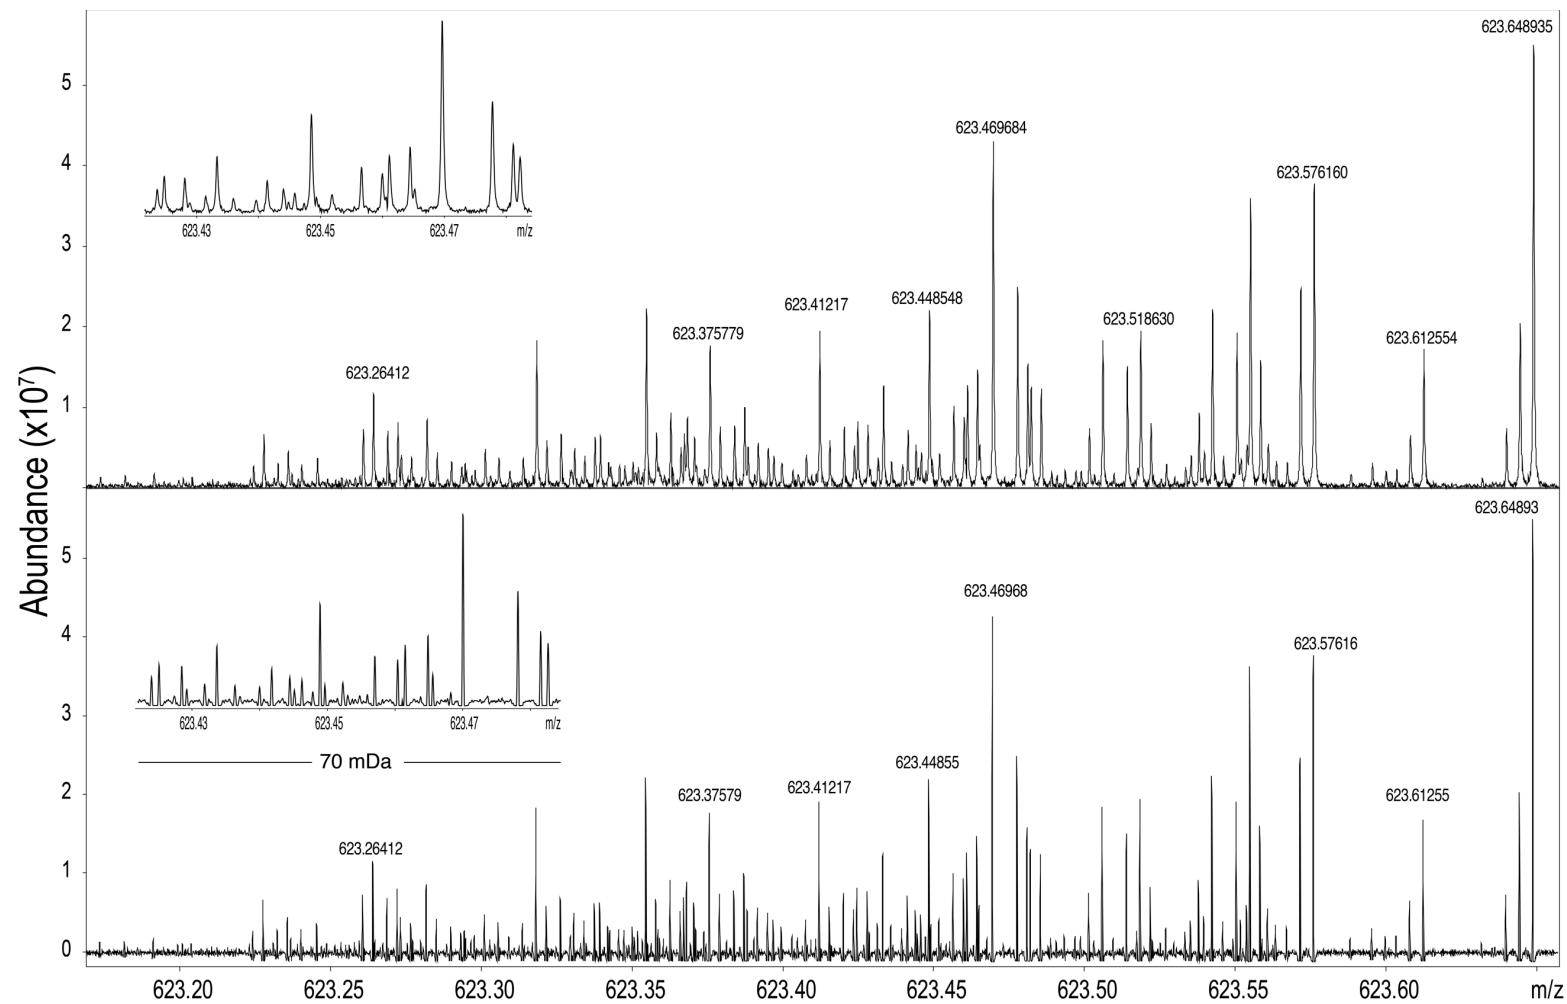

Fig. S17 Comparison between 1 Da regions of segments for  $m/z$  623, both in magnitude (above) and absorption mode (bottom), for the ND-F sample. The mean resolving power of 1,800,000 FWHM in magnitude mode was increased 1.7-fold to 3,060,000 FWHM by using absorption mode.

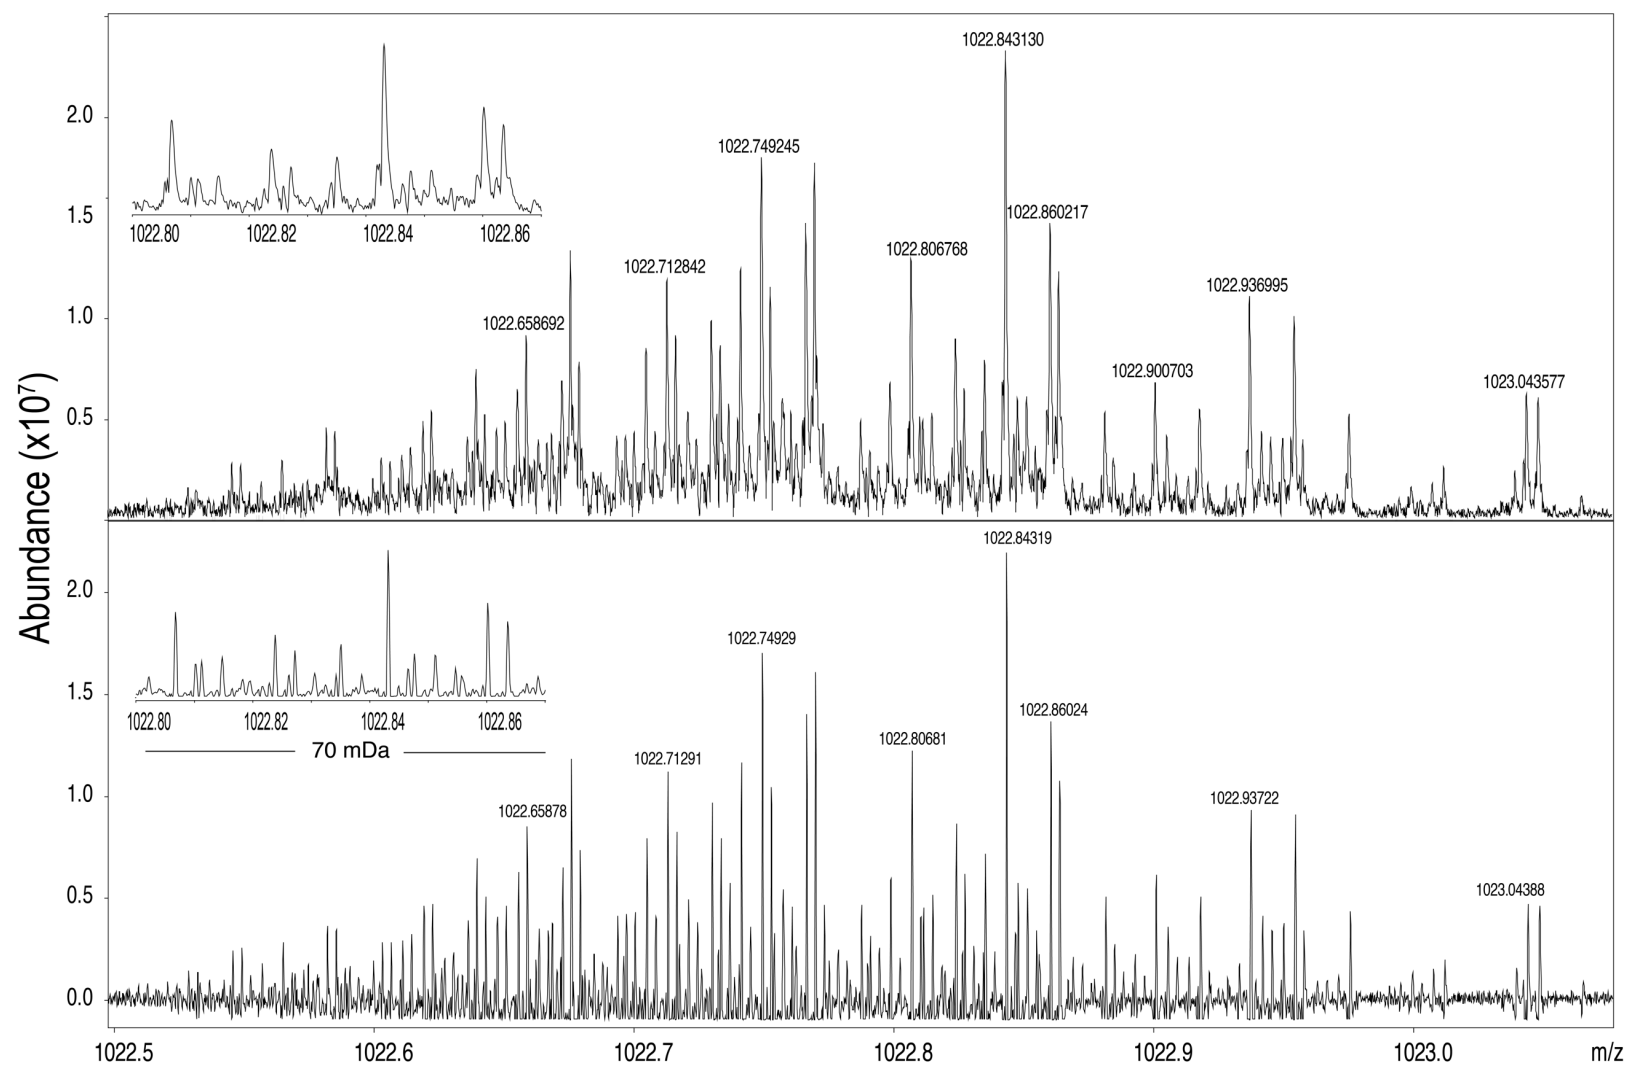

Fig. S18 Comparison between 1 Da regions of segments centred at  $m/z$  1022, both in magnitude mode (above) and absorption mode (bottom) for the ND-F sample. The resolution is increased by approximately 1.6x from 1,890,000 FMHW to 3,054,000 FWHM when moving from magnitude mode to absorption mode.

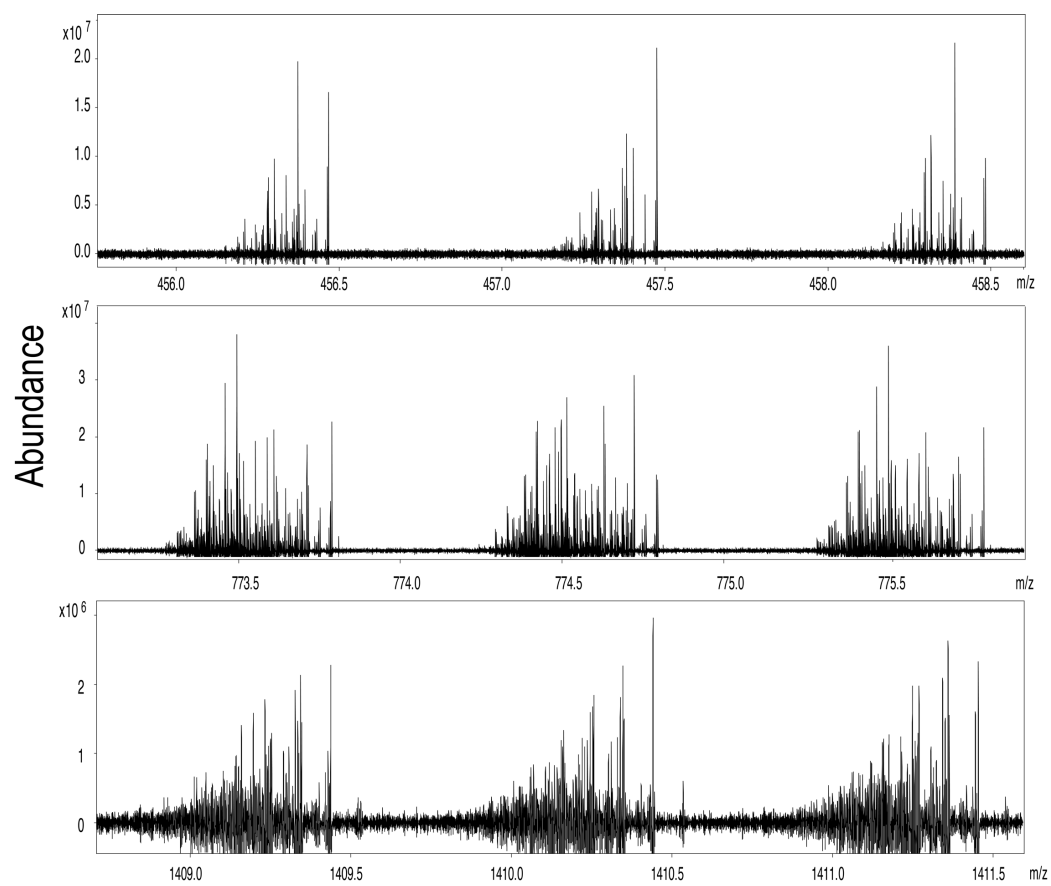

Fig. S19 Comparison of varying mass defect distributions at each nominal mass, spanning different  $m/z$  ranges, for the ND-F sample. The number of peaks per nominal Da increases with increasing  $m/z$ .

Table S6

Approximate number of peaks detected with smallest mass separations (below 3.4 mDa and rounded to two decimal places) specified below for the ND-F sample; the differences therefore count each peak once, instead of allowing a peak to have multiple mass separations. The asterisk denotes mass differences reported in previous works.<sup>13</sup>

| <b>Mass difference</b> |                                                                                             | <b>Number of peaks</b> |
|------------------------|---------------------------------------------------------------------------------------------|------------------------|
| <b>3.37 mDa*</b>       | C <sub>3</sub> vs SH <sub>4</sub>                                                           | 32,903                 |
| <b>1.79 mDa*</b>       | C <sup>13</sup> C <sup>14</sup> N vs H <sub>3</sub> O <sub>3</sub>                          | 10,190                 |
| <b>1.10 mDa*</b>       | C <sub>4</sub> vs <sup>13</sup> CH <sub>3</sub> <sup>32</sup> S                             | 37,651                 |
| <b>0.69 mDa*</b>       | C <sub>6</sub> N vs H <sub>5</sub> O <sub>3</sub> S                                         | 3,557                  |
| <b>0.56 mDa*</b>       | C <sup>13</sup> C <sup>14</sup> N vs H <sub>5</sub> <sup>34</sup> S                         | 1,858                  |
| <b>2.29 mDa</b>        | C <sub>3</sub> H <sub>2</sub> O vs <sup>13</sup> C <sub>2</sub> N <sub>2</sub>              | 4,460                  |
| <b>1.08 mDa</b>        | <sup>13</sup> C <sub>2</sub> N <sub>2</sub> vs H <sub>6</sub> OS                            | 4,195                  |
| <b>0.96 mDa</b>        | C <sub>4</sub> N <sub>2</sub> vs <sup>13</sup> C <sub>2</sub> H <sub>2</sub> O <sub>3</sub> | 1,411                  |
| <b>0.83 mDa</b>        | <sup>13</sup> C <sub>3</sub> vs C <sub>2</sub> HN                                           | 7,245                  |
| <b>0.71 mDa</b>        | C <sub>2</sub> H <sub>3</sub> S vs <sup>13</sup> CNO <sub>2</sub>                           | 10,676                 |
| <b>0.58 mDa</b>        | H <sub>4</sub> OS <sub>2</sub> vs C <sub>3</sub> N <sup>34</sup> S                          | 281                    |
| <b>0.54 mDa</b>        | H <sub>8</sub> S <sup>34</sup> S vs C <sub>5</sub> N                                        | 211                    |
| <b>0.45 mDa</b>        | N <sub>2</sub> O <sub>2</sub> H vs C <sub>4</sub> <sup>13</sup> C                           | 669                    |
| <b>0.39 mDa</b>        | <sup>13</sup> C <sub>2</sub> NO <sub>2</sub> vs C <sub>6</sub>                              | 1131                   |

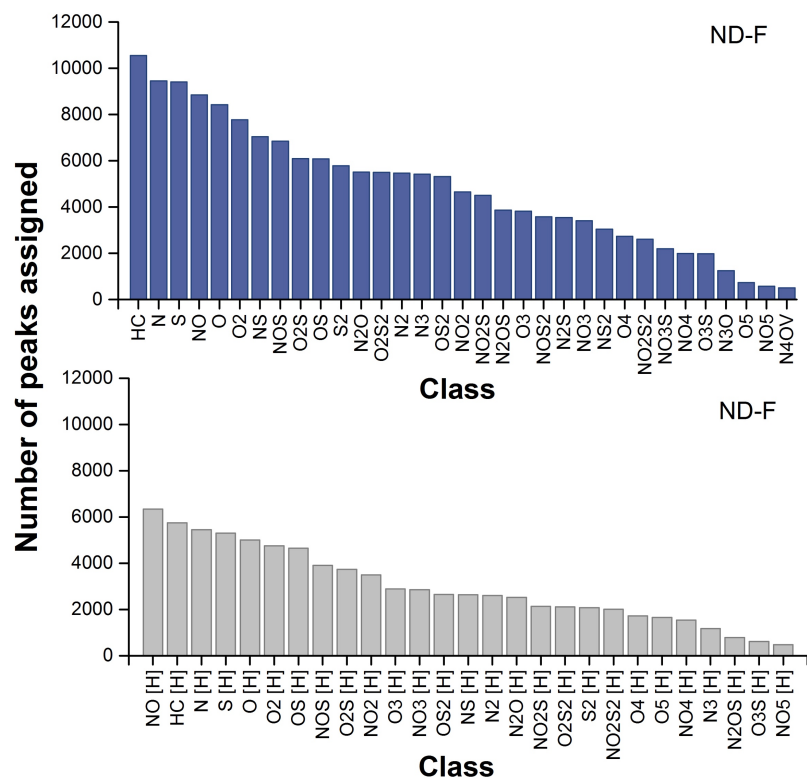

Fig. S20 Number of peaks assigned per class for the OCULAR data set for the ND-F sample. The species with the greatest number of peaks corresponded to less complex heteroatomic compositions. Similarly, to the results obtained for the D-F sample, almost the radical ion species accounted for approximately twice as many peaks as the protonated species.

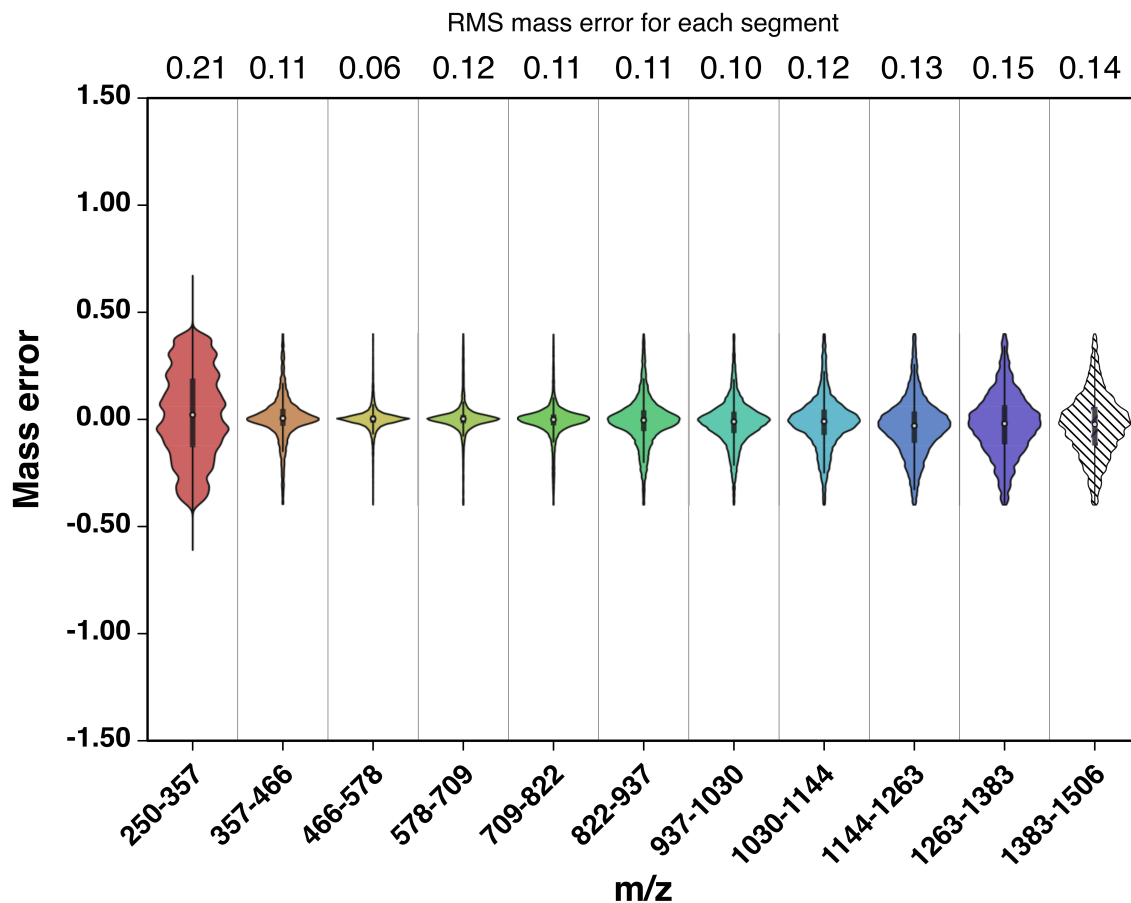

Fig. S21 Violin plots showing the range of mass error (in ppm) of the assignments for the ND-F sample using the OCULAR method. The error is expressed in ppm and the RMS mass errors for each 100 Da segment is listed at the top. The high error found at low  $m/z$  was due to the combination of the low number of peaks and low signal-to-noise in this region.

## References

- 1 M.-J. Parra, A.-Y. Leon and L. Ja. Hoyos, *CT&F - Ciencia, Tecnol. y Futur.*, 2010, **4**, 83–90.
- 2 E. R. L. Rocha, M. S. Lopes, M. R. Wolf MacIel, R. MacIel Filho and L. C. Medina, *Ind. Eng. Chem. Res.*, 2013, **52**, 15488–15493.
- 3 ASTM Standard D4052-16, *Standard Test Method for Density, Relative Density, and API Gravity of Liquids by Digital Density Meter*, ASTM International, West



- Conshohocken, PA, 2016.
- 4 *ASTM D2007 Standard Test Method for Characteristic Groups in Rubber Extender and Processing Oils and Other Petroleum-Derived Oils by the Clay-Gel Absorption Chromatographic Method*, ASTM International, West Conshohocken, PA, 2016.
  - 5 *ASTM D1552 Sulfur in Petroleum Products*, West Conshohocken, PA, ASTM Inter., 2003.
  - 6 S. Golden, T. Barletta and S. White, *Sour & Heavy*, 2012, **1**, 11–15.
  - 7 Y. Qi and P. B. O'Connor, *Mass Spectrom. Rev.*, 2014, **33**, 333–352.
  - 8 E. N. Nikolaev, *Int. J. Mass Spectrom.*, 2015, **377**, 421–431.
  - 9 Y. Cho, A. Ahmed, A. Islam and S. Kim, *Mass Spectrom. Rev.*, 2015, **34**, 248–263.
  - 10 Y. Cho, A. Ahmed and S. Kim, *Anal. Chem.*, 2013, **85**, 9758–9763.
  - 11 L. C. Krajewski, R. P. Rodgers and A. G. Marshall, *Anal. Chem.*, 2017, **89**, 11318–11324.
  - 12 A. Gaspar and W. Schrader, *Rapid Commun. Mass Spectrom.*, 2012, **26**, 1047–1052.
  - 13 D. F. Smith, D. C. Podgorski, R. P. Rodgers, G. T. Blakney and C. L. Hendrickson, *Anal. Chem.*, 2018, **90**, 2041–2047.
